# Supplementary material
Source: PubMed Central journal article supplement (PMC5598763)
Supplement: NIHMS902576-supplement-Supplementary_material.pdf [file NIHMS902576-supplement-Supplementary_material.pdf]

I: Evaluation of  $^3J_{\text{CSCC}}$  using alternate theoretical models.

Figure S1:

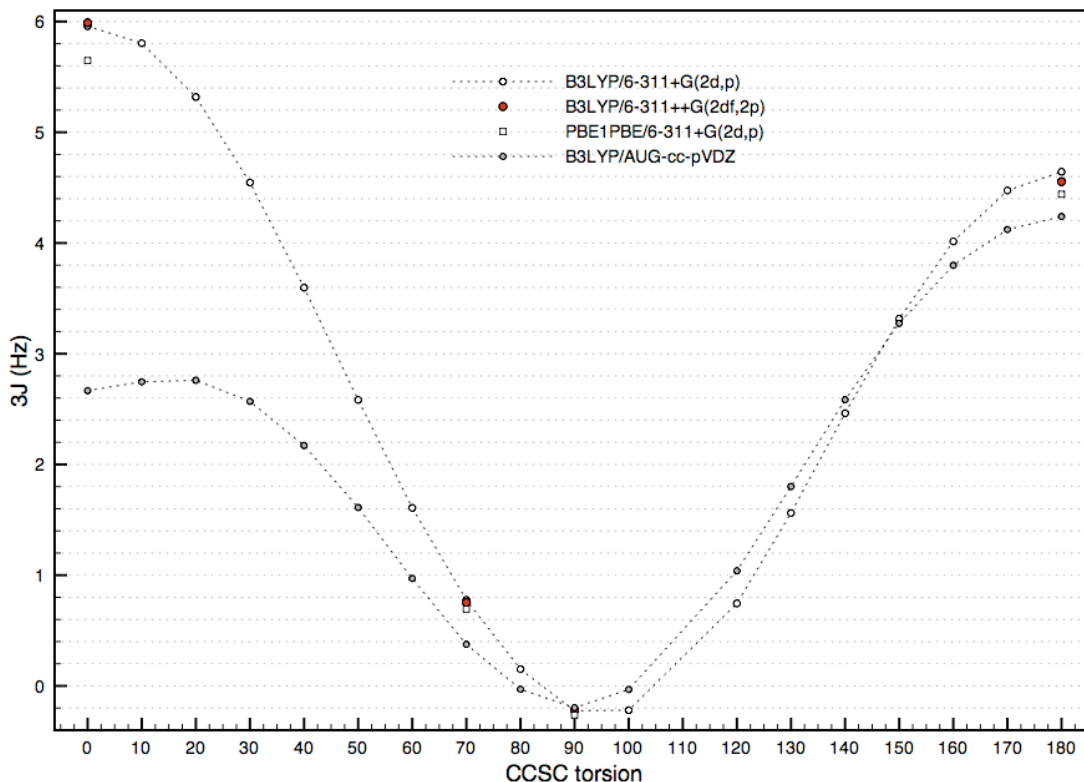

The figure shown above compares calculated  $^3J_{\text{CSCC}}$  values determined for the model compound ethyl methyl sulfide (EMS). The calculations cover the full torsional range for the B3LYP/6-311+G(2d,p) and B3LYP/AUG-cc-pVDZ levels of theory, and include a few additional values calculated using two other models: B3LYP/6-311++G(2df,2p) and PBE1PBE/6-311+G(2d,p). As is apparent from the figure, three of the basis sets yielded similar results, while the results obtained using B3LYP/AUG-cc-pVDZ differ significantly. The latter calculations also do not give a good fit to a Karplus relation, requiring an additional introduction of a  $\sin(\theta)$  term in order to fit the decreasing values predicted near  $\theta = 0$ . However, nearly all of the significant discrepancies are for very small angles, which are largely excluded from most experimental data since such values are energetically unfavorable. Overall, the results for all four models are in good agreement for the energetically favored conformational space. As noted in the text, the calculations using B3LYP/6-311+G(2d,p) were consistently found to provide the best fit for the available model compounds.

II: Calculated  ${}^3J_{\text{CSCH}}$  coupling constants at the B3LYP/6-311+G(2d,p) level of theory as a function of the absolute value of the subtended dihedral angle.

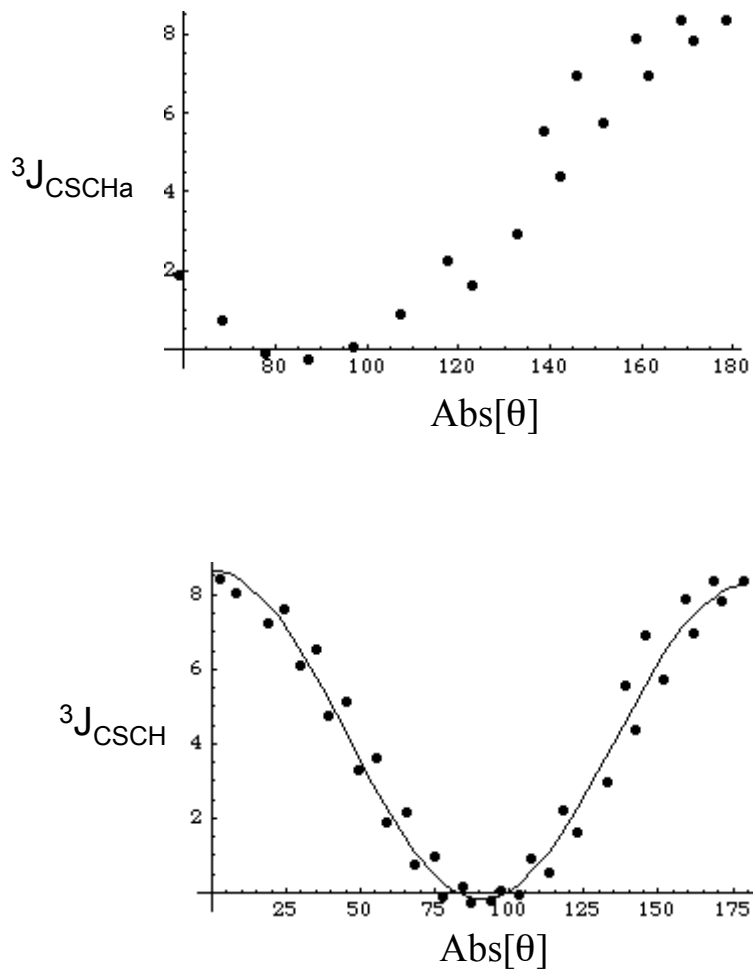

Figure S2. The figures above illustrate that the  ${}^3J_{\text{CSCH}}$  is not an even function of  $\theta$ , i.e.,  ${}^3J_{\text{CSCH}}(\theta) \neq {}^3J_{\text{CSCH}}(-\theta)$ . This is particularly apparent when only one of the protons is considered, as in the top figure. This behavior requires a modification of the Karplus relations such as that described in the text.

### III: Comparison with Tvaroska Data and Tafazzoli calculations

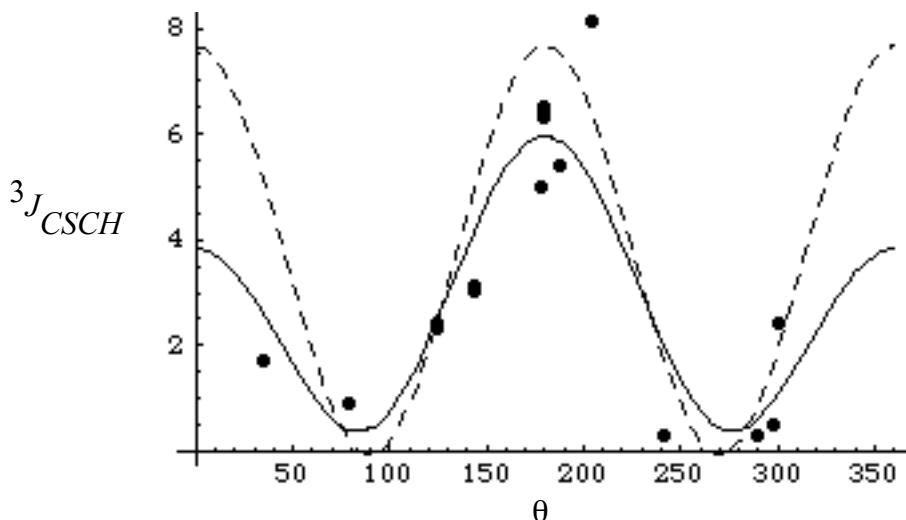

Figure S3. The plot shown above summarizes the data in Table 1 of Tvaroska et al. (Carbohydrate Res. 229, 225-231; 1992) (filled circles), the dihedral angle dependence which they obtained based on this data (solid line and Eq. 8 in the accompanying manuscript), and the curve obtained here for the Karplus relation describing the average shift of the two protons (dashed line and Eq. 7 in the accompanying manuscript):

$${}^3J_{CSCH}(Tvaroska) = 0.45 - 1.06 + 0.216\cos\theta + 4.44\cos^2\theta \quad [S1]$$

and

$${}^3J_{CSCH}(mean) = -0.05 + 7.7\cos^2\theta \quad [S2]$$

We also note here the calculated values for the coupling constants in Table 4 of the study by Tafazzoli and Ghiasi (Carbohydrate Res. 342, 2086-2096; 2007) are inconsistent with the plots shown in Figure 8 of that reference, and our fit of the calculated coupling constant results in Table 4 resulted in dramatically different Karplus relations for  ${}^3J_{CSCH}$ ,  ${}^3J_{COCH}$ , and  ${}^3J_{CCCH}$  than are presented in that reference.

IV: Isotropic and anisotropic shielding parameters for the S-CH<sub>3</sub> carbon of EMS were calculated at the B3LYP/6-311+G(2d,p) (left two columns) and B3LYP/6-311++G(2df,2p) (right two columns) levels of theory. The calculated isotropic shielding using the two approaches is nearly identical:

| Torsion $\theta$ | B3LYP/6-311+G(2d,p) |            | B3LYP/6-311++G(2df,2p) |            |
|------------------|---------------------|------------|------------------------|------------|
|                  | Isotropic           | Anisotropy | Isotropic              | Anisotropy |
| 0                | 167.3347            | 23.7538    | 167.2768               | 22.9909    |
| 10               | 167.1926            | 23.6338    | 167.1644               | 22.8712    |
| 20               | 166.9307            | 23.4888    | 166.9375               | 22.7628    |
| 30               | 166.6592            | 23.6912    | 166.6861               | 23.0279    |
| 40               | 166.3020            | 24.8190    | 166.3373               | 24.2040    |
| 50               | 165.6761            | 27.1431    | 165.7022               | 26.5587    |
| 60               | 164.7811            | 30.3064    | 164.8023               | 29.6814    |
| 70               | 163.6403            | 33.1281    | 163.6633               | 32.4774    |
| 80               | 162.3215            | 34.7888    | 162.3361               | 34.1351    |
| 90               | 160.9211            | 35.7356    | 160.9372               | 35.0969    |
| 100              | 159.9692            | 36.1847    | 159.9824               | 35.5595    |
| 110              | 159.2968            | 36.4819    | 159.3182               | 35.8987    |
| 120              | 159.0658            | 36.4987    | 159.0673               | 36.0196    |
| 130              | 159.0168            | 36.4093    | 158.9957               | 35.9513    |
| 140              | 159.1604            | 36.2077    | 159.1131               | 35.7384    |
| 150              | 159.4330            | 35.9825    | 159.3881               | 35.4701    |
| 160              | 159.7916            | 35.8221    | 159.7622               | 35.2652    |
| 170              | 160.1356            | 35.7185    | 160.1264               | 35.1070    |
| 180              | 160.2685            | 35.6998    | 160.2704               | 35.0696    |

## V. Conformation of Free Methionine

We sought to further evaluate the conformation of free methionine using both the  ${}^3J_{C\beta C\epsilon}$  and  ${}^3J_{C\epsilon H\gamma}$  coupling constants, measured as 1.55 Hz and 4.4 Hz, respectively. Although due to the chiral center at  $C\alpha$ , the probabilities and energy minima of the two gauche conformations, defined below, are not identical, the  $H_a$  and  $H_b$  resonances were not individually assigned, and the data were fit by assuming conformations 1 and 3, defined in the diagram below, are symmetric and equally populated.

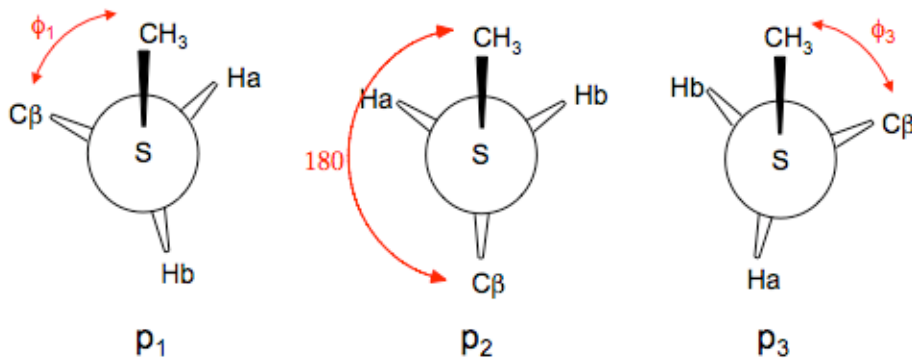

The three experimental parameters:  ${}^3J_{CSCC}^{\text{exp}}$ ,  ${}^3J_{CSCHa}^{\text{exp}}$ , and  ${}^3J_{CSCHb}^{\text{exp}}$ , plus a normalization condition are insufficient for determining the five parameters:  $p_1$ ,  $p_2$ ,  $p_3$ ,  $\phi_1$  and  $\phi_3$ . However, based on the assumption of symmetry discussed above, we have used the approximations:  $\phi_3 = -\phi_1$ , and  $p_1 = p_3 = \frac{1}{2}(1-p_2)$ , leaving only two parameters,  $\phi_1$  and  $p_2$  to be determined using the equations below:

$$\begin{aligned} {}^3J_{CSCC}^{\text{exp}} &= p_1 {}^3J_{CC}(\phi_1) + p_2 {}^3J_{CC}(180) + p_3 {}^3J_{CC}(\phi_3) \\ {}^3J_{CHa}^{\text{exp}} &= p_1 {}^3J_{CSCHa}(\phi_1 + 120) + p_2 {}^3J_{CSCHa}(-60) + p_3 {}^3J_{CSCHa}(\phi_3 + 120) \\ {}^3J_{CHb}^{\text{exp}} &= p_1 {}^3J_{CSCHb}(\phi_1 - 120) + p_2 {}^3J_{CSCHb}(60) + p_3 {}^3J_{CSCHb}(\phi_3 - 120) \end{aligned} \quad [S3]$$

In the above expressions, the selection of the correct equation for  ${}^3J_{CSCHa}$  and  ${}^3J_{CSCHb}$  is based on the calculation requiring that  ${}^3J_{CSCHa}(-60^\circ) < {}^3J_{CSCHa}(+60^\circ)$  and conversely,  ${}^3J_{CSCHb}(-60^\circ) > {}^3J_{CSCHb}(+60^\circ)$ . Following this procedure, the second and third equations given above become identical. Setting  ${}^3J_{CSCC} = 1.55$  Hz and  ${}^3J_{CSCHa} = {}^3J_{CSCHb} = 4.4$  Hz, the above equations define curves that depend on the parameters  $p_2$  and  $\phi_3$ . The intersection of these curves defines the parameter values that satisfy both of the coupling constant constraints. A plot of the two curves is shown below in panel a of Figure S4. From this figure, it is apparent that the two curves for  ${}^3J_{CSCHa/b}$  and  ${}^3J_{CSCC}$  do not intersect until  $\phi \sim 100^\circ$ , at which the three fractional populations approach a limiting value of  $p_1 = p_2 = p_3 = 1/3$ . This solution is in poor agreement with the energy minimum predicted for the model EMS compound which, as discussed in the text, predicts a  $\phi_g$  minimum near  $67^\circ$ , and a fractional trans probability of  $\sim 0.2$ . A somewhat improved result was obtained by using Equation 6 for the average coupling constant with  $H_a$  and  $H_b$ , rather

than the two separate expressions for  ${}^3J_{\text{CSCH}_a}$  and  ${}^3J_{\text{CSCH}_b}$ . In this case, the curves intersect at  $\phi \sim 80^\circ$ , with  $p_2$  still  $\sim 1/3$  (panel b of Figure S4, below).

One basis for this discrepancy is probably the broad minima around the stable, staggered conformations, so that the nominally *gauche* and *trans* rotamers represent thermal averaging covering  $\pm 15$  to  $25^\circ$ . Improved agreement with theory could be obtained by introducing additional offset angles so that, e.g., the *trans* conformation corresponds to  $160^\circ$  rather than to  $180^\circ$ . In addition, the results were found to be extremely sensitive to the coupling constant values. Much closer agreement with the theoretical results for EMS were obtained using Eq. 5 and increasing the  ${}^3J_{\text{CSCH}}^{\text{exp}}$  value by 7 %, or by using Eq. 6 and increasing the  ${}^3J_{\text{CSCH}}^{\text{exp}}$  value by 3 %. This approach yielded  $\phi$ g values near  $70^\circ$  and  $p_2$  values of 0.22 and 0.21, respectively. The two results are shown in panels c and d in figure S4 below:

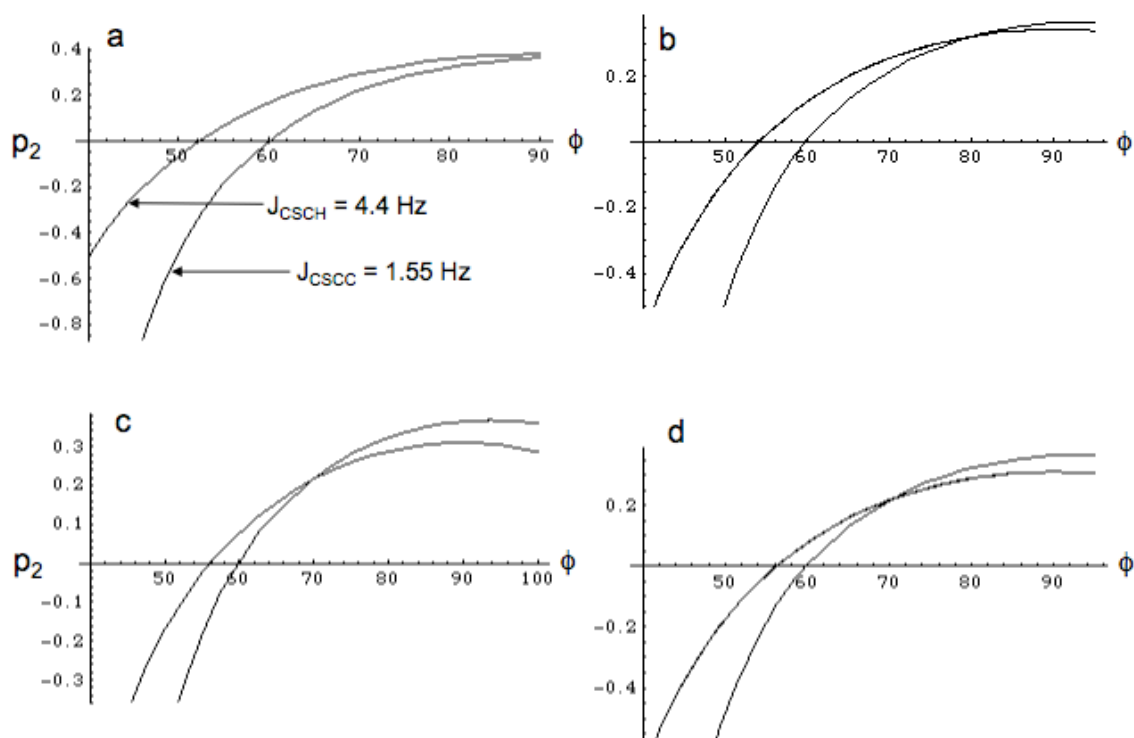

Figure S4. Analysis of methionine coupling data. The two curves correspond to the equations given above for  ${}^3J_{\text{CSCH}_a}$  and  ${}^3J_{\text{CSCH}_b}$  considered as a function of the fractional trans concentration  $p_2$  and the gauche angle  $\phi$ . a) Data fit using equations 3 and 5 from the text. b) analogous calculations using equations 3 and 6; c) fits obtained using equations 3 and 5, and increasing the experimental  ${}^3J_{\text{CSCH}}$  value by 7 %; d) fit obtained using equations 3 and 6, and increasing the experimental  ${}^3J_{\text{CSCH}}$  value by 3 %.

VI: Methionine  $\chi_i$  values during an Amber simulation of the calmodulin-*M13* complex.

The calculations below correspond to the three  $\chi_i$  values for each calmodulin methionine residue in the Amber simulations of the calmodulin-*M13* complex. The calculations began with structure 2BBM, and the data shown correspond to a 16 ns simulation period beginning 14 ns after the simulations were initiated. A few of the periods during which methionine residues adopted an mmp conformation are indicated with red rectangles. The  $\chi_3$  values observed during these periods are atypically large,  $\sim 100^\circ$ .

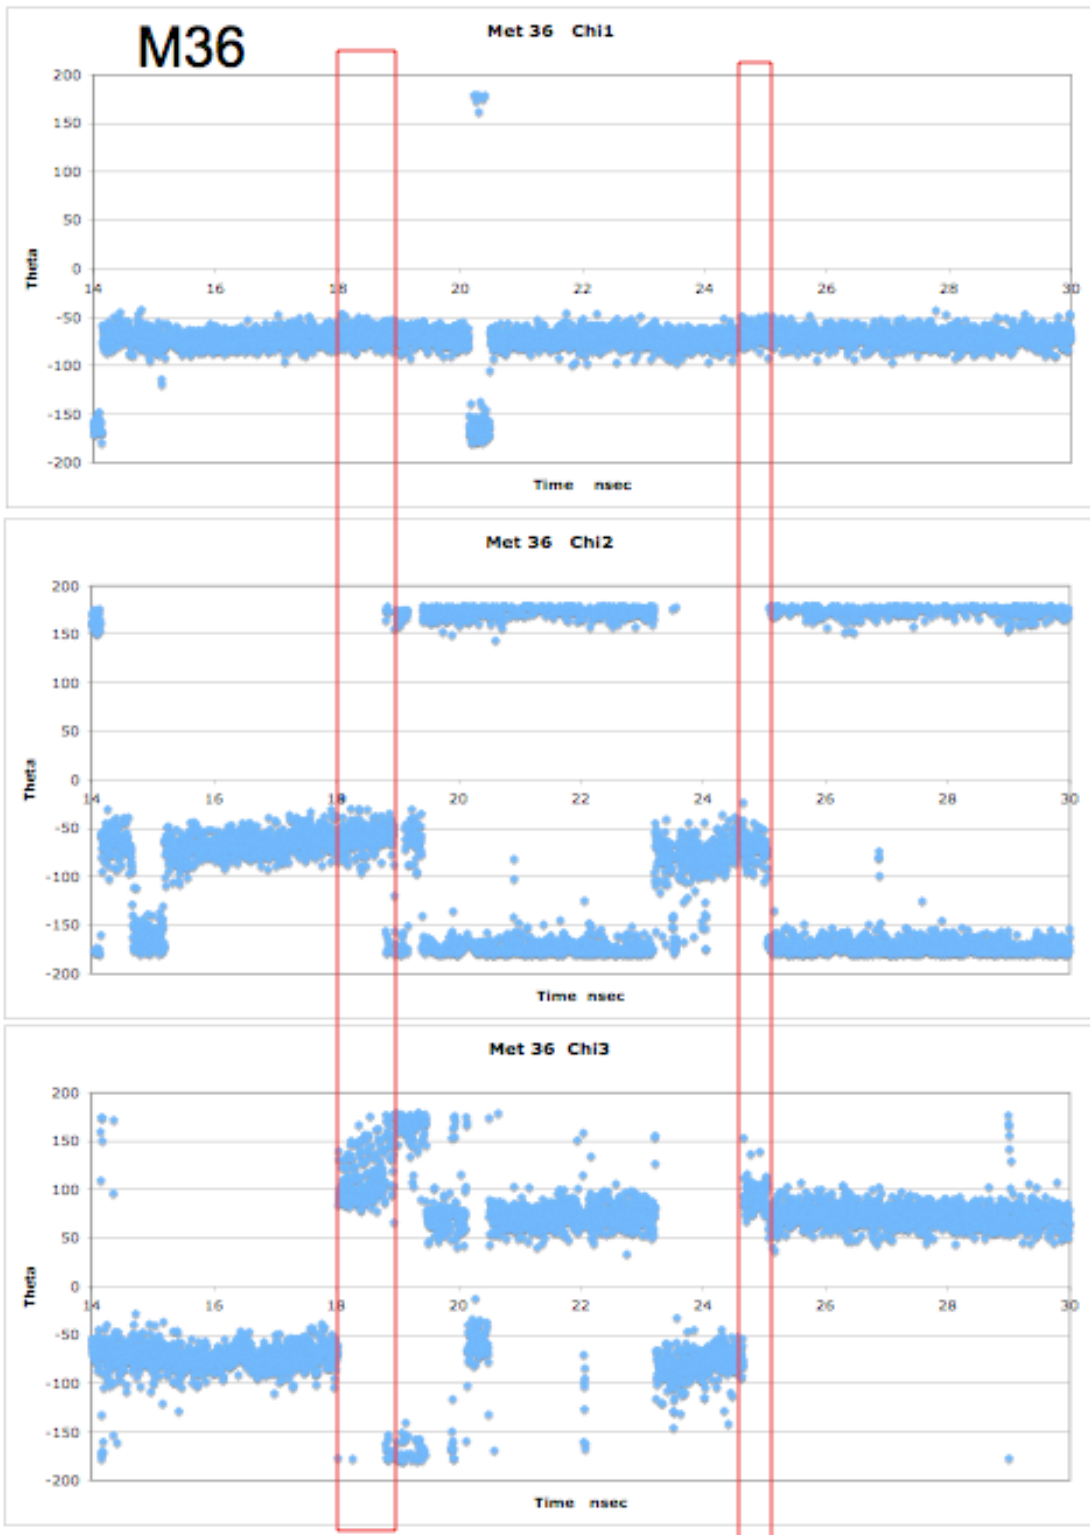



# M51

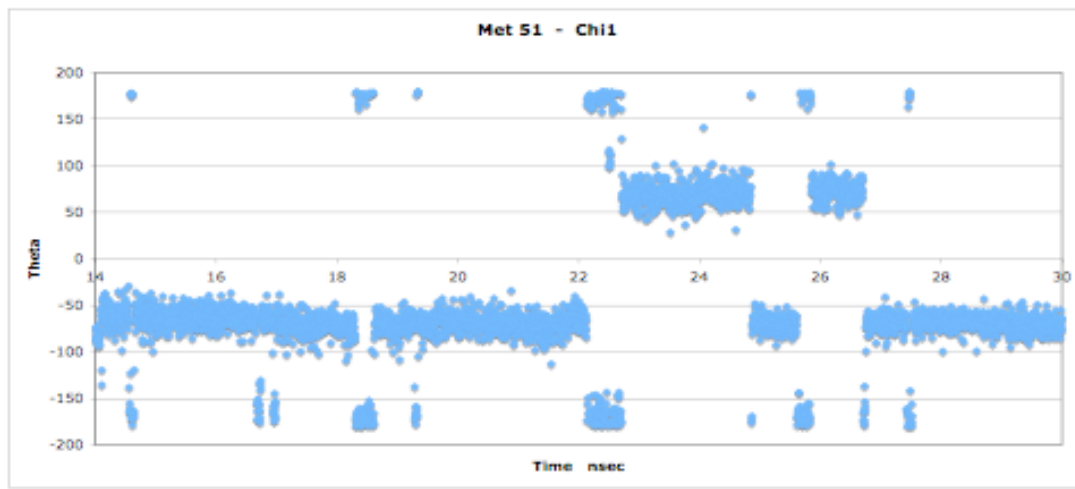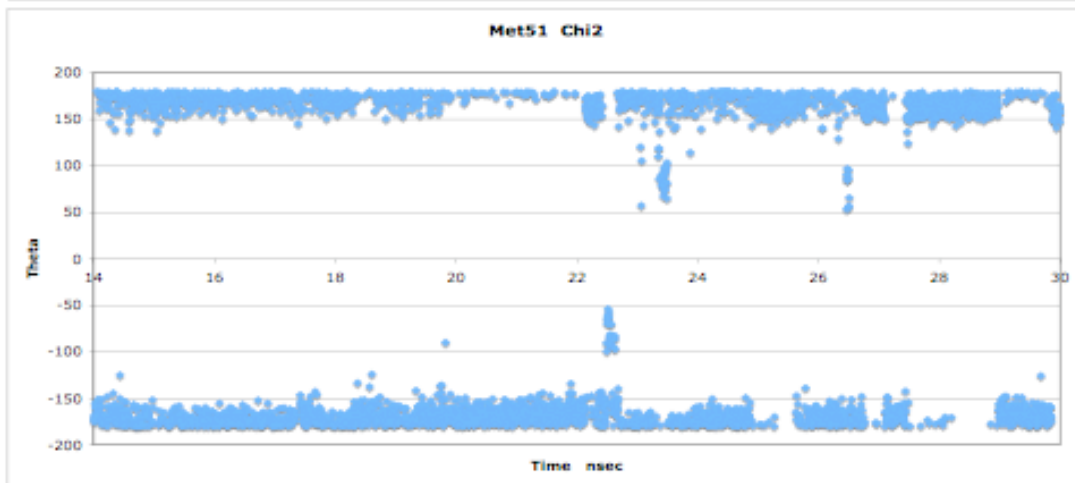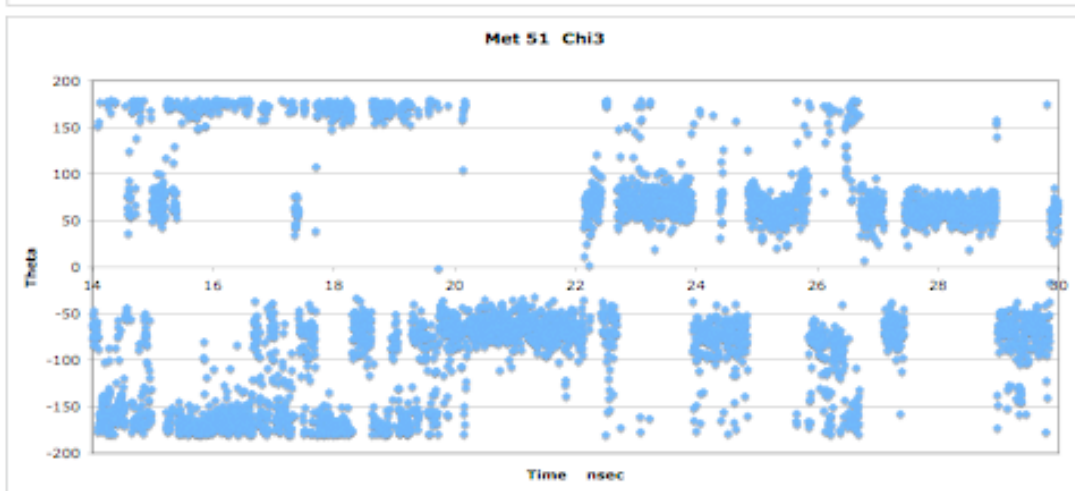

# M71

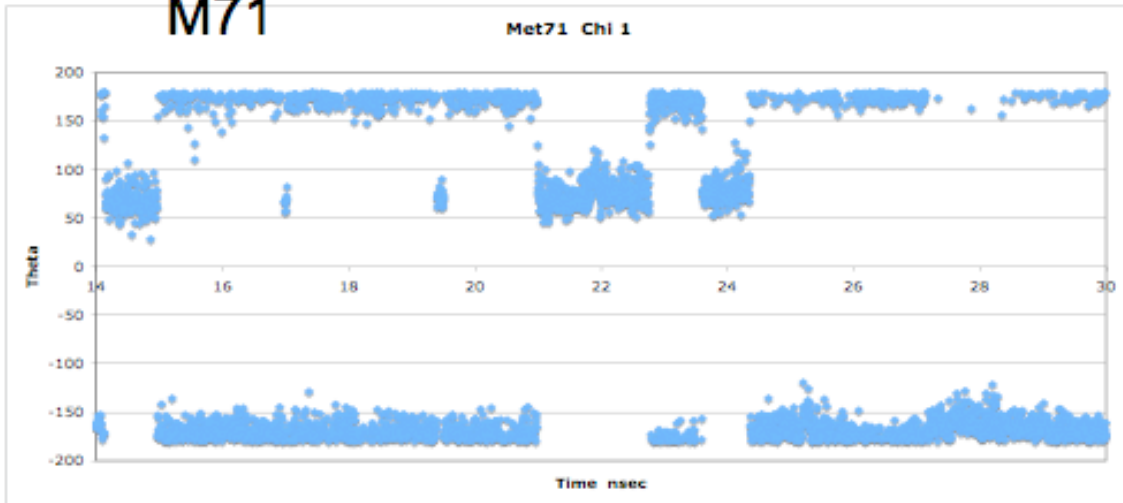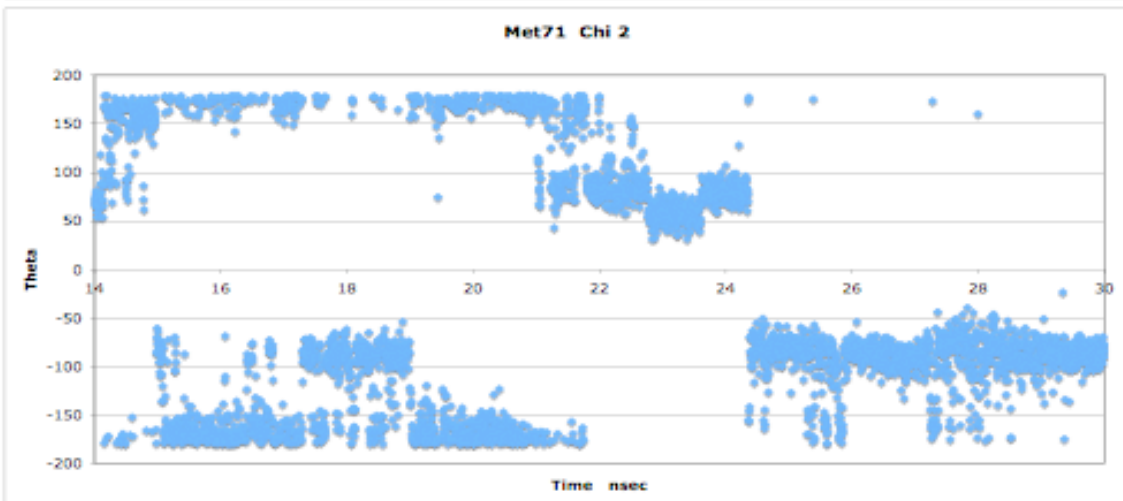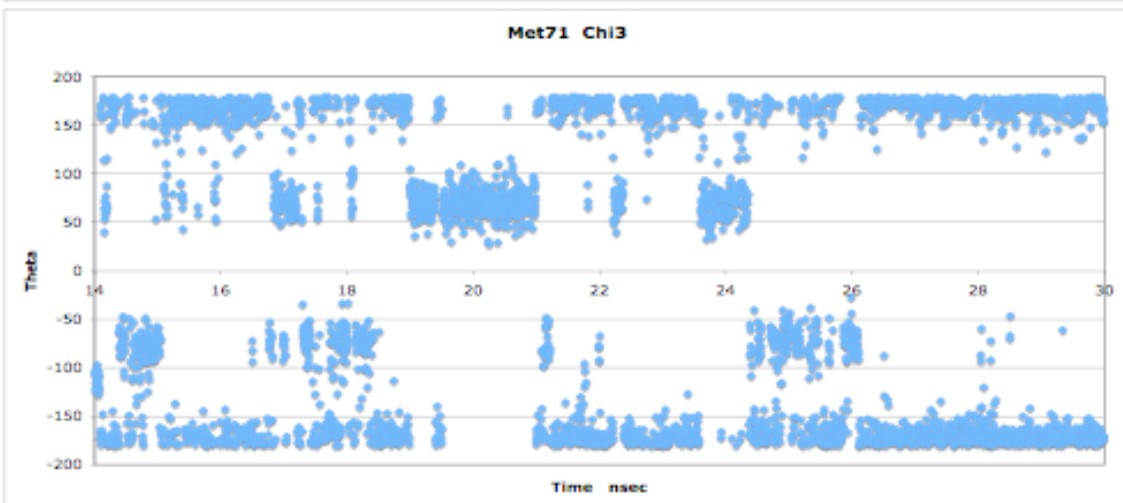

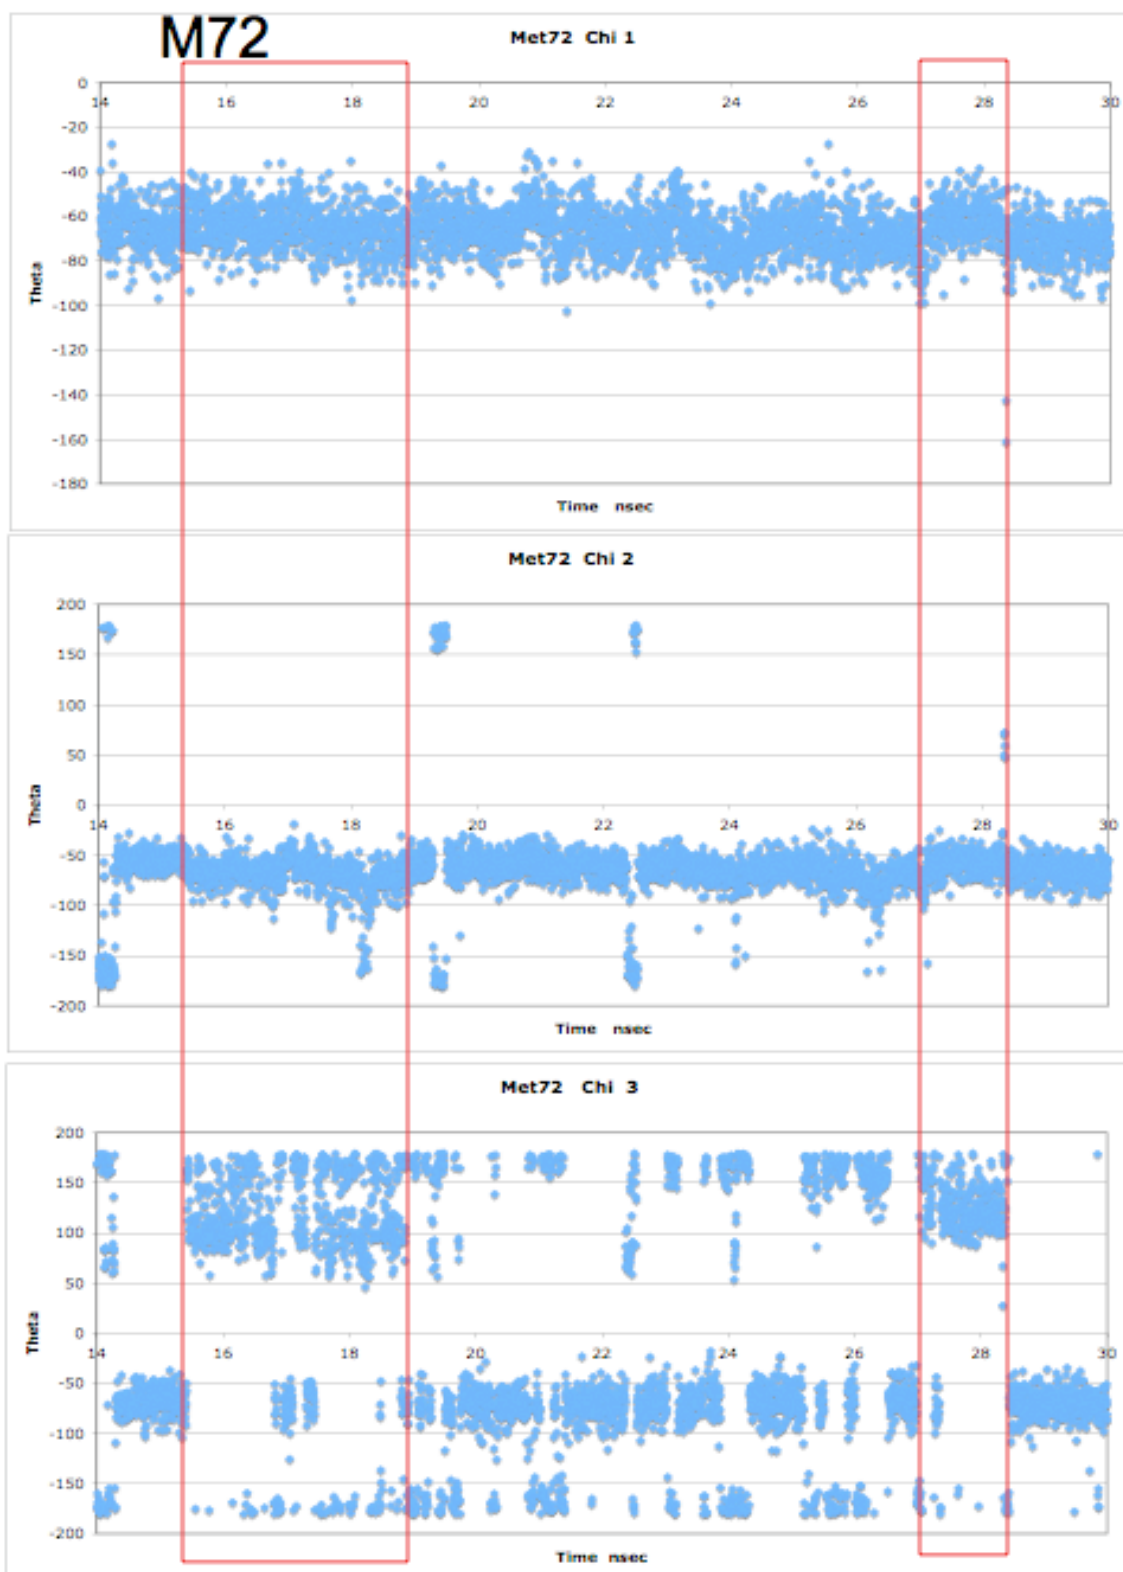

# M76

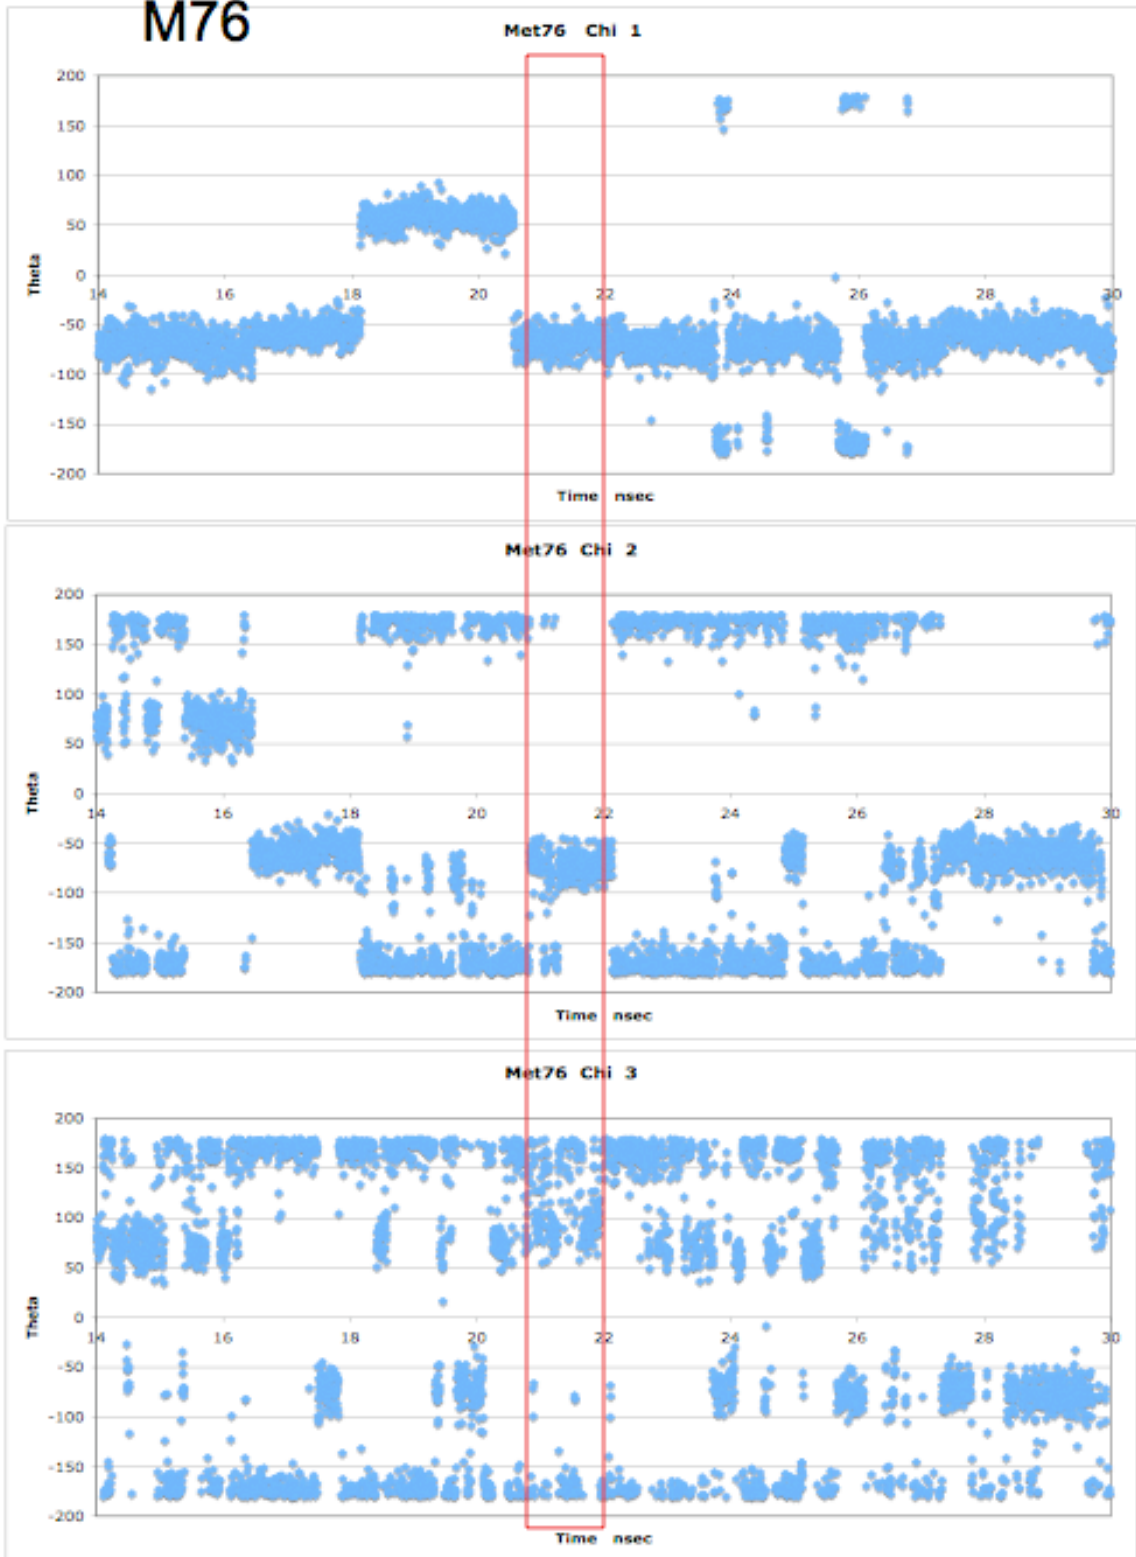

# M109

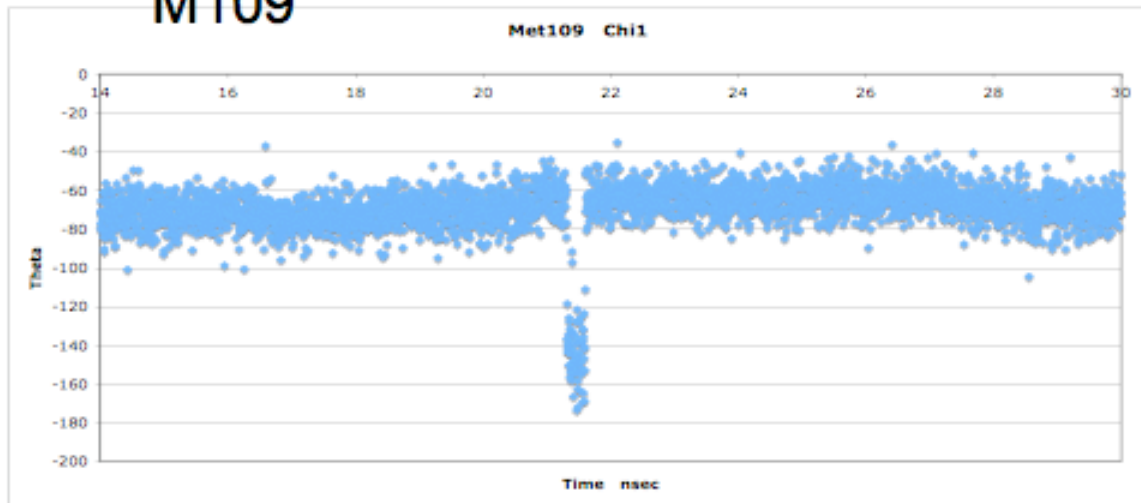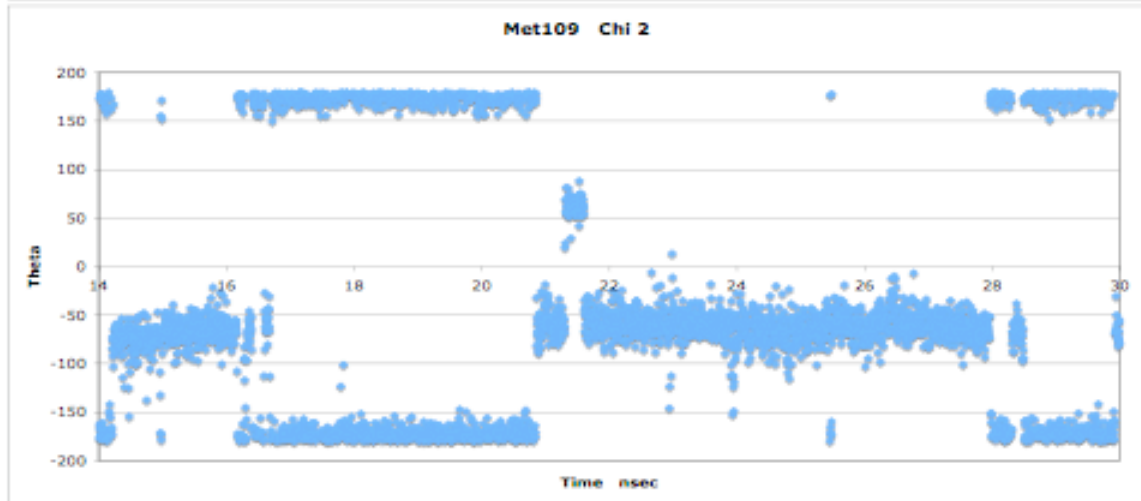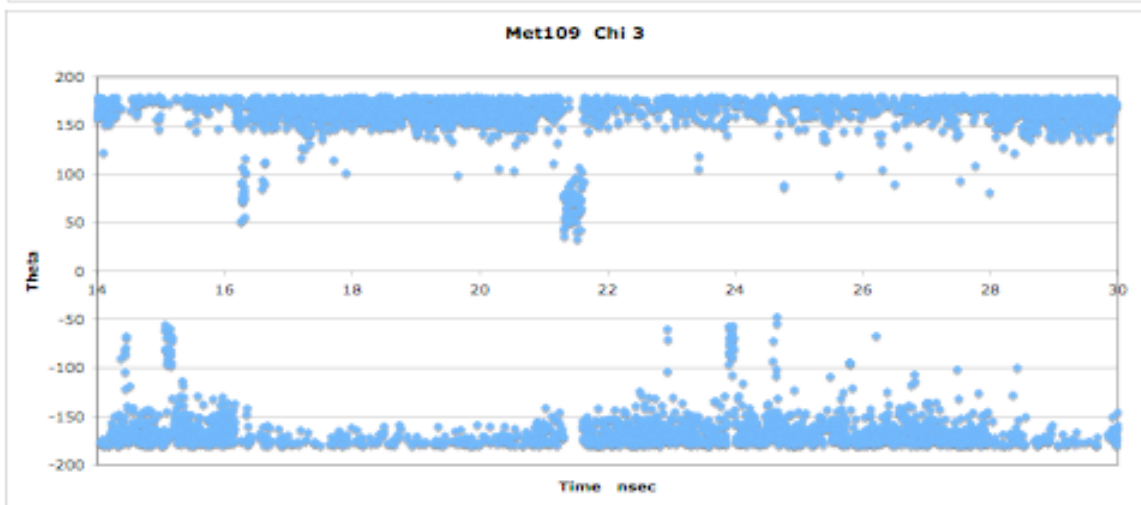

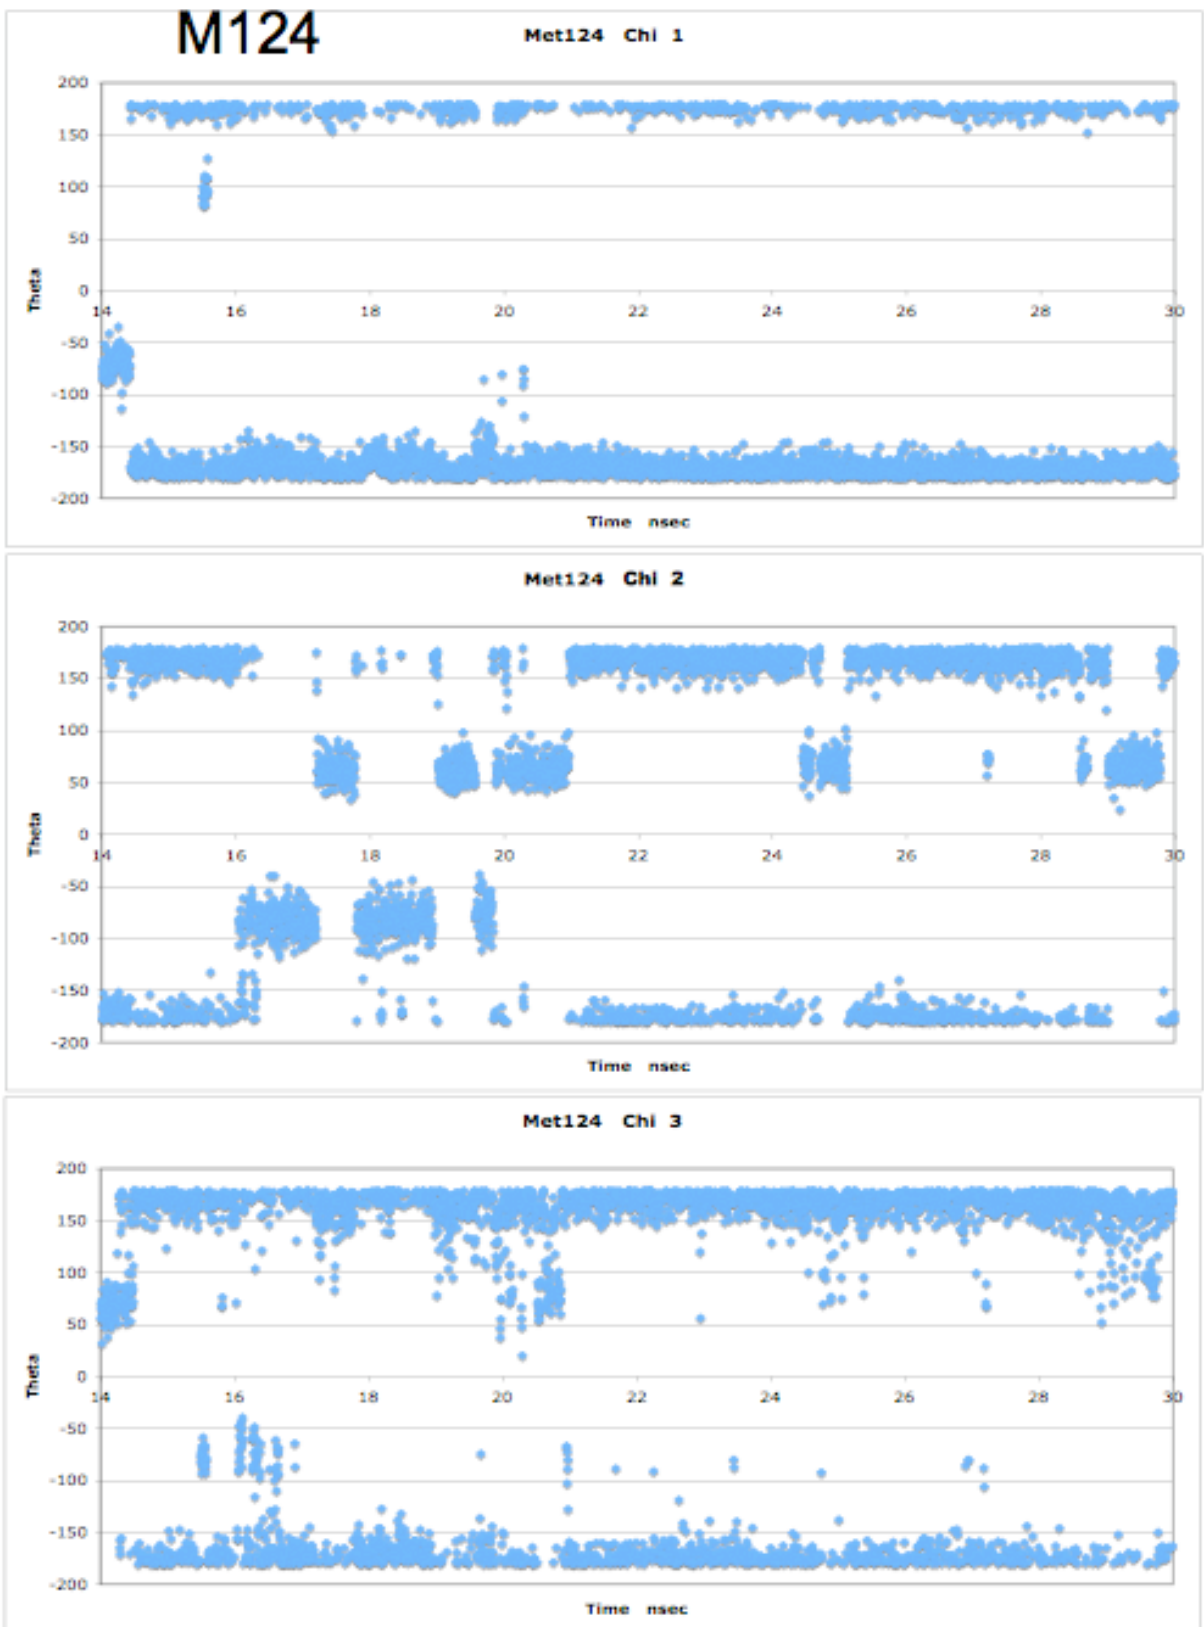

# M144

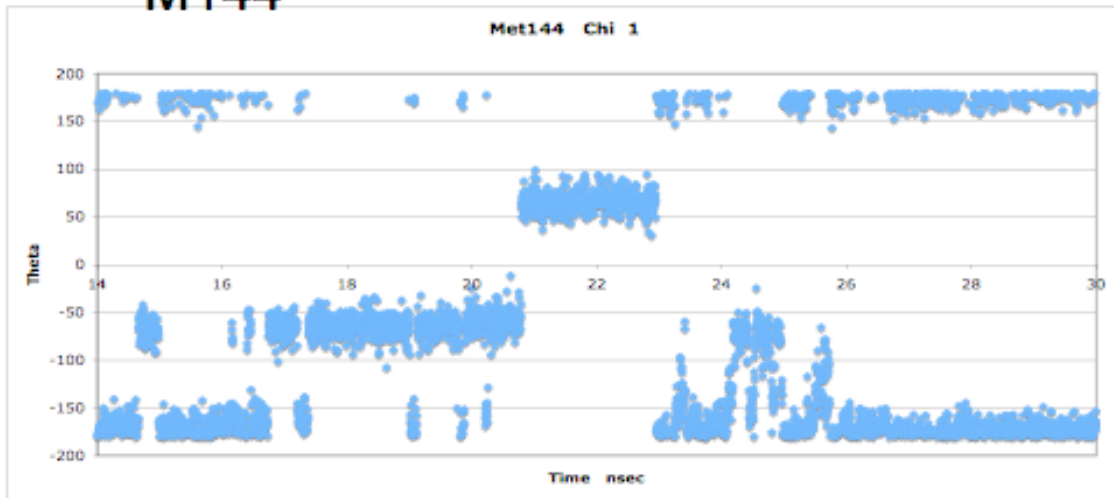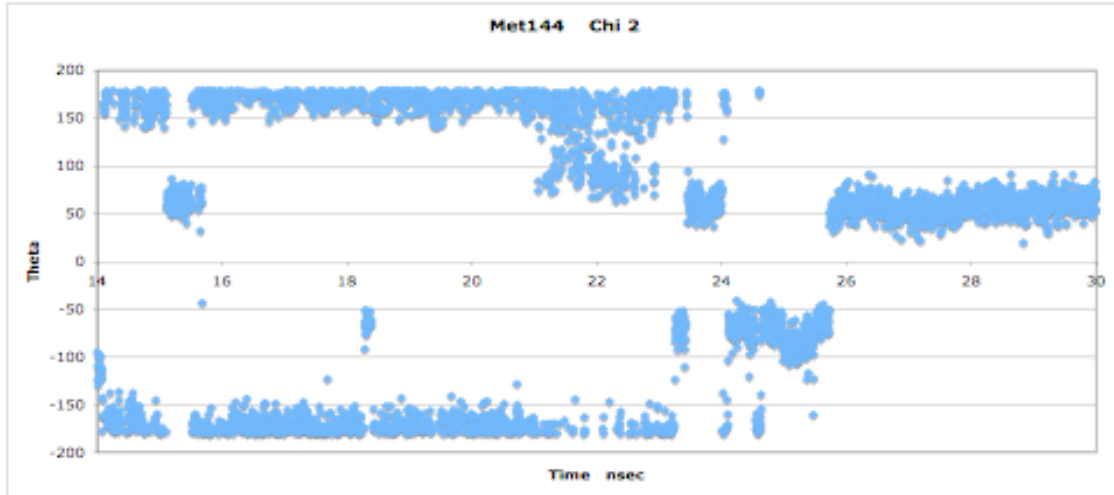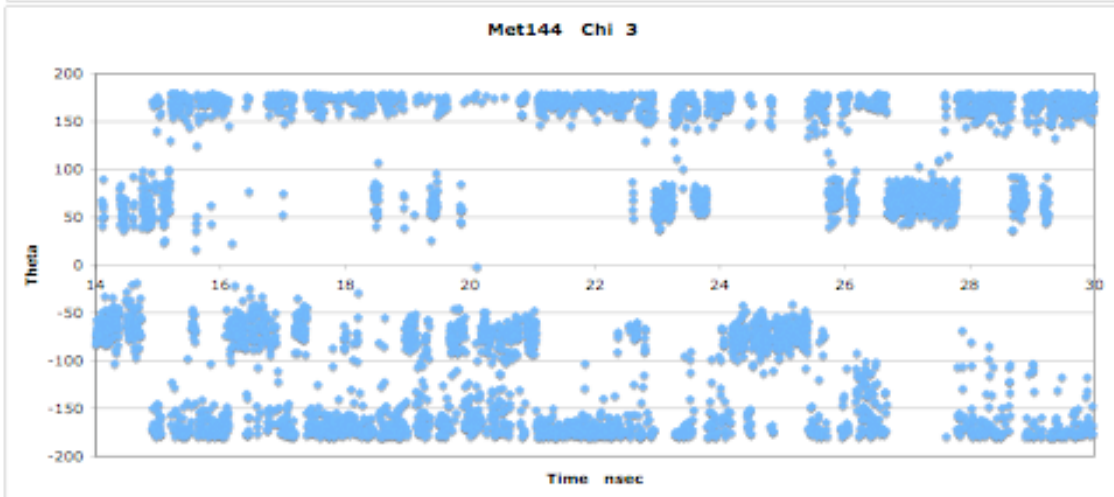

# M145

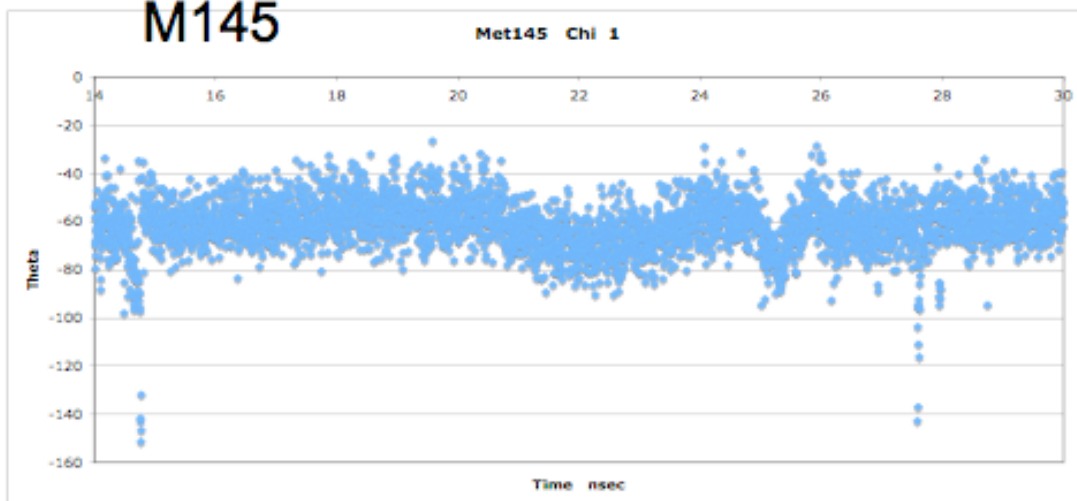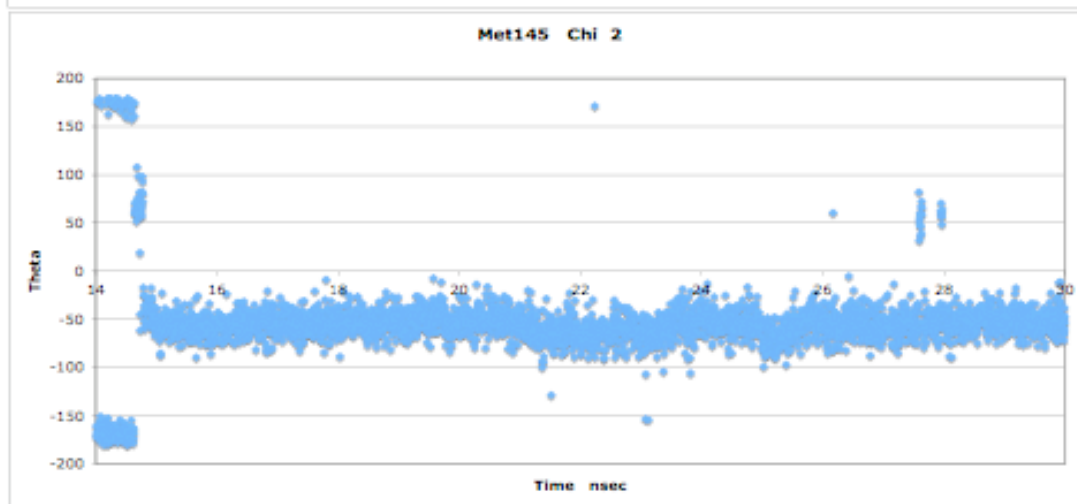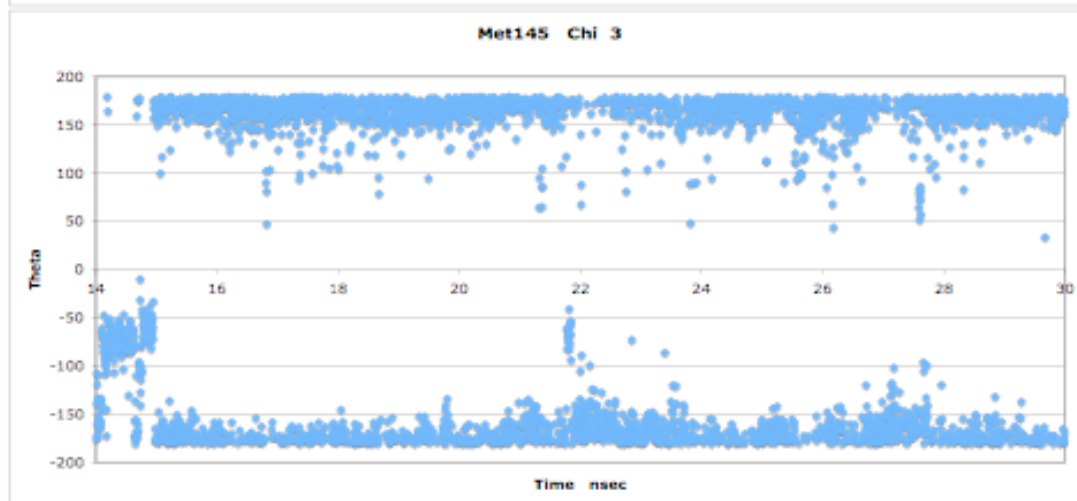



VII: Electric field effects on S-<sup>13</sup>CH<sub>3</sub> shifts

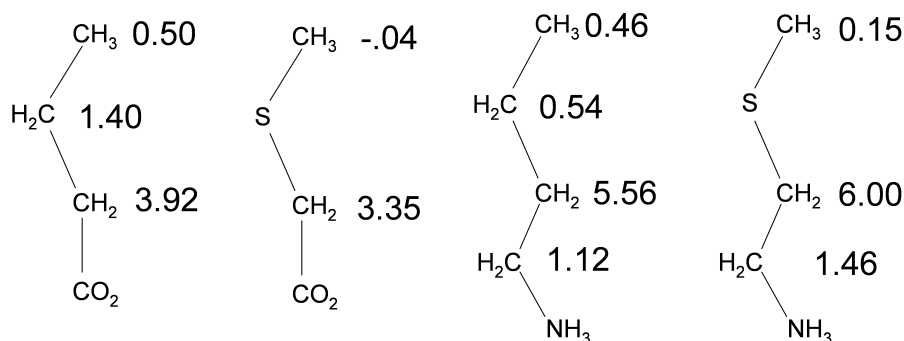

The numbers in the above figure are the  $\Delta^{13}\text{C} = \delta^{13}\text{C}(\text{deprotonated state}) - \delta^{13}\text{C}(\text{protonated state})$ . As is apparent from these results, the  $\Delta^{13}\text{C}$  values for the S-CH<sub>3</sub> containing molecules (methylthio)acetate and 2-(methylthio)ethylamine), are substantially lower than observed for the aliphatic analogs. This behavior probably results primarily from the greater conformational heterogeneity of the sulfur-containing analogs, which will tend to average the electric field polarizations over a wider distribution of orientations. Titration data for the methyl group of 2-(methylthio)ethylamine is shown below:

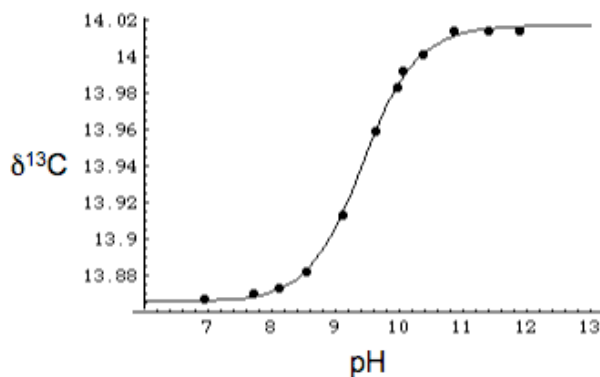

Figure S5. Titration <sup>13</sup>C shift of the methyl resonance of 2-(methylthio)ethylamine (the fourth molecule pictured above) as a function of pH.

VIII: Solvent effect on the shift of the methyl resonance of methylthiopropanol

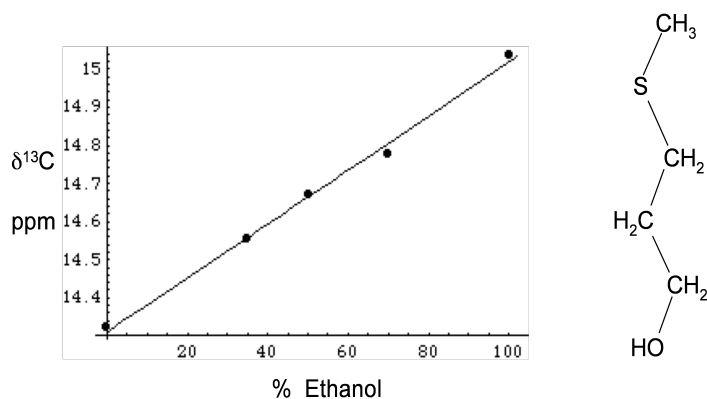

Figure S6.  $^{13}\text{C}$  shift of the methyl resonance of 3-(methylthio)-1-propanol as a function of solvent composition. The % ethanol- $\text{d}_6$  (v/v) was varied as indicated. Methylthiopropanol was selected for this study due to its solubility in both water and organic solvents. The spectrometer was locked on external  $\text{D}_2\text{O}$ , present in an outer capillary. The observed solvent dependence is small compared with the conformationally-dependent shift derived from the DFT calculations.

IX: Effect of lattice contacts on a buried methionine residue – transferrin residue M109

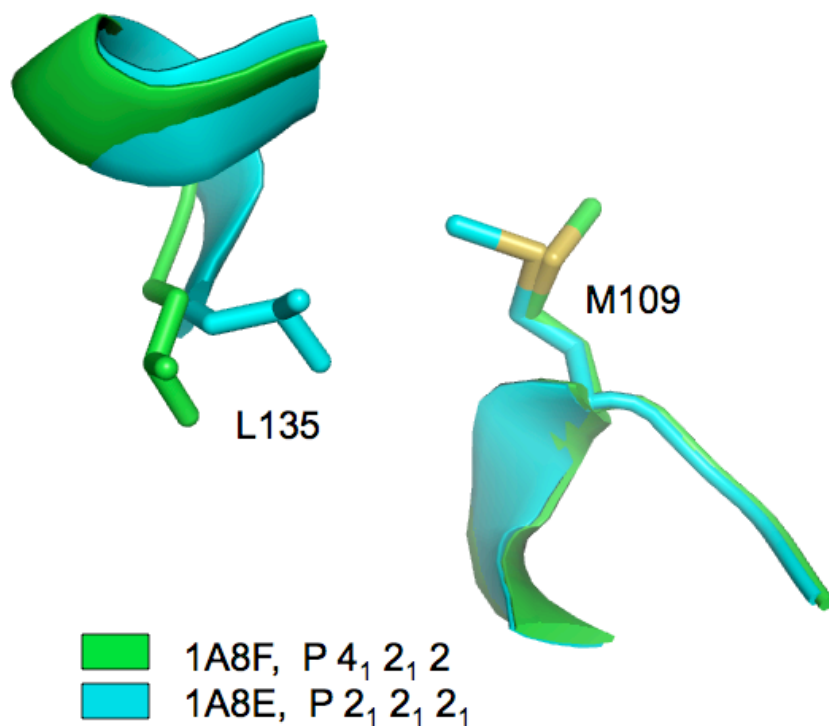

Figure S6. The figure shown above illustrates how crystal packing can influence even the conformation of a buried methionine residue. Structure 1A8E crystallized in the  $P 2_1 2_1 2_1$  space group (cyan), while structure 1A8F crystallized in the  $P 4_1 2_1 2$  space group (green). The two structures shown correspond to the N-lobe of human transferrin (MacGillivray et al. *Biochemistry* 37, 7919-7928; 1998). Different lattice interactions in the two different space groups alter the position of a loop containing residue L135, and this in turn alters the conformation of buried methionine residue M109.
